# Supplementary material for: Prognosis classification of breast cancer with distant lymph node metastasis IIIc or M1 category
Source: Research Square preprint supplement (doi:10.21203/rs.3.rs-295675/v1), 2021-03-22
Supplement: Supplementary file 1 [file 65bf149900e637cd50ff5f74.docx]

**Table S1.** Type of surgery in M1-LN

| Category | | No. of patients | Percent (%) |
| --- | --- | --- | --- |
| Local surgery |  | 146 | 45.2 |
|  | Partial mastectomy a | 6 | 1.86 |
|  | Partial mastectomy with nipple resection | 1 | 0.31 |
|  | Lumpectomy or excisional biopsy | 54 | 16.72 |
|  | Rescission of the biopsy site for gross or microscopic residual disease | 9 | 2.79 |
|  | Segmental mastectomy | 5 | 1.55 |
|  | Subcutaneous mastectomy b | 2 | 0.62 |
|  | Total (simple) mastectomy c | 69 | 21.36 |
| Radical surgery |  | 175 | 54.18 |
|  | Modified radical mastectomy d | 174 | 53.87 |
|  | Radical mastectomy e | 1 | 0.31 |
|  | Extended radical mastectomy f | 0 | 0 |
| Mastectomy, NOS g |  | 1 | 0.31 |
| Surgery, NOS |  | 1 | 0.31 |
| Total |  | 323 | 100 |

a Removal of the gross primary tumor and some of the breast tissue (breast-conserving or breast-preserving surgery)

b Removal of breast tissue without the nipple and areolar complex or overlying skin

c Removal of all breast tissue, the nipple, and the areolar complex. Axillary dissection is not performed.

d Removal of all breast tissue, the nipple, the areolar complex, and variable amounts of breast skin in continuity with the axilla. The specimen may or may not include a portion of the pectoralis major muscle

e Removal of breast tissue, nipple, areolar complex, variable amount of skin, pectoralis minor, and/or pectoralis major, as well as en bloc axillary dissection

f Removal of breast tissue, nipple, areolar complex, variable amounts of skin, pectoralis minor, and/or pectoralis major, as well as the removal of internal mammary nodes and en bloc axillary dissection

g Not Otherwise Specified (NOS) is a subcategory in systems of disease/disorder classification, such as ICD-9, ICD-10, or DSM-IV. It is generally used to note the presence of an illness where the symptoms presented were sufficient to make a general diagnosis but where a specific diagnosis was not performed.

**Table S2.** Baseline characteristics of patients with and without chemotherapy in M1-LN before and after propensity score weighting (PSW).

**Table S3.** Baseline characteristics of patients with and without radiotherapy in M1-LN before and after propensity score weighting (PSW)

**Table S4.** Baseline characteristics of patients with and without surgery in M1-LN before and after propensity score weighting (PSW)

**Table S5.** Baseline characteristics of patients with comprehensive therapy (surgery, chemotherapy, and radiotherapy) and those with chemotherapy only in M1-LN before and after propensity score weighting (PSW)
